# Supplementary material
Source: Springer Nature journal article supplement (https://www.springermedizin.de/resource/supplementary/13075_2013_4154_MOESM4_ESM.pdf/9696212)

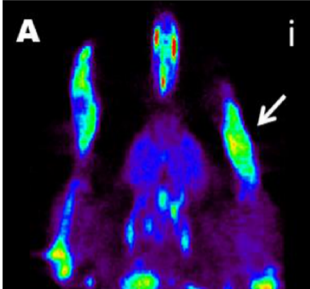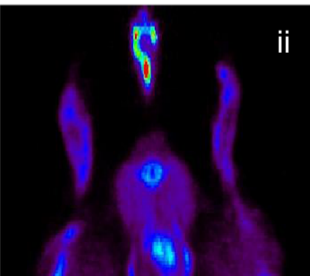

0.6% ID/cc

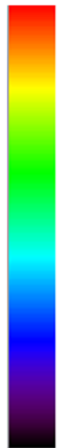

0% ID/cc

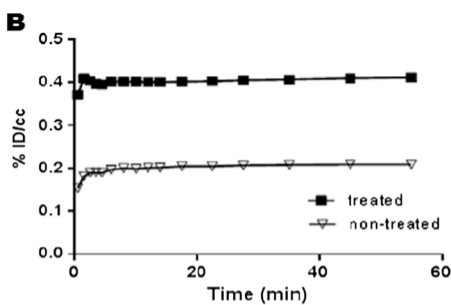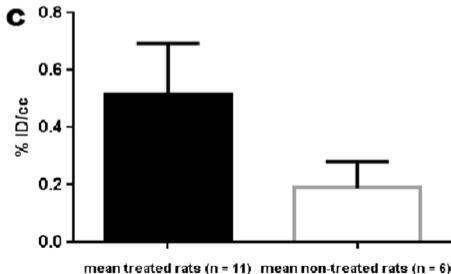

Supplement: MOESM4 [file 9696212]
